# Supplementary material for: Tailorable hierarchical structures of biomimetic hydroxyapatite micro/nano particles promoting endocytosis and osteogenic differentiation of stem cells
Source: Royal Society of Chemistry journal article supplement (doi:10.1039/d0bm00443j), 2020-01-01
Supplement: d0bm00443j1.pdf [file d0bm00443j1.pdf]

## Supporting Information

### **Tailorable Hierarchical Structures of Biomimetic Hydroxyapatite micro/nano Particles Promoting Endocytosis and Osteogenic Differentiation of Stem Cells**

Dong Xu <sup>a,b,c</sup>, Yuxin Wan <sup>a,b,c</sup>, Zhihao Li <sup>a,b,c</sup>, Chunbao Wang <sup>a,b,d</sup>, Qingxia Zou <sup>a,b,c</sup>, Chang Du <sup>a,b,c,e,\*</sup>, and Yingjun Wang <sup>a,b,d,e,\*\*</sup>

<sup>a</sup> *Department of Biomedical Engineering, School of Materials Science and Engineering, South China University of Technology, Guangzhou 510641, PR China*

<sup>b</sup> *National Engineering Research Center for Tissue Restoration and Reconstruction, South China University of Technology, Guangzhou 510006, PR China*

<sup>c</sup> *Key Laboratory of Biomedical Materials and Engineering of the Ministry of Education, and Innovation Center for Tissue Restoration and Reconstruction, South China University of Technology, Guangzhou 510006, PR China*

<sup>d</sup> *Key Laboratory of Biomedical Engineering of Guangdong Province, South China University of Technology, Guangzhou 510006, PR China*

<sup>e</sup> *Guangzhou Regenerative Medicine and Health Guangdong Laboratory, 510005, PR China*

*\*Corresponding authors:*

*\*E-mail: duchang@scut.edu.cn (Chang. Du).*

*\*\*E-mail: imwangyj@163.com (YingJun. Wang).*

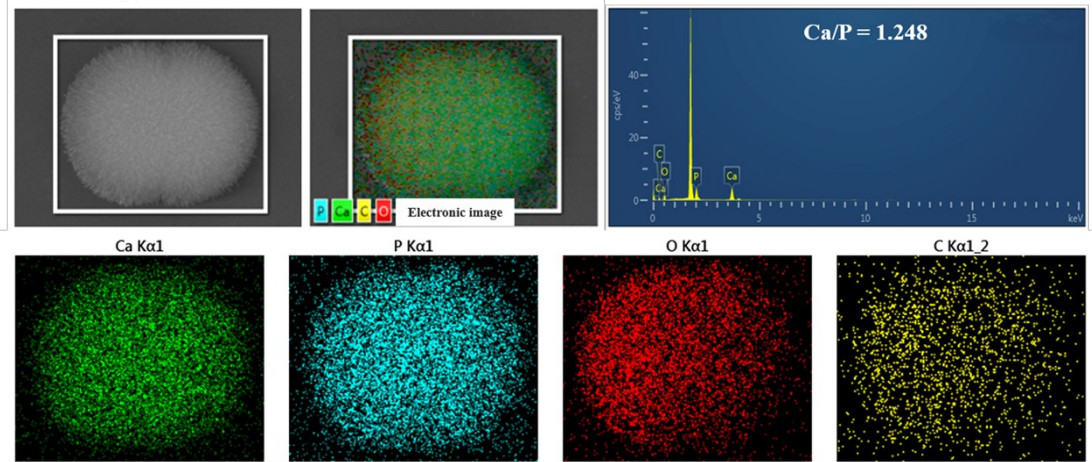

**Fig. S1.** The element compositions of the microspheres were analyzed by SEM-EDS.

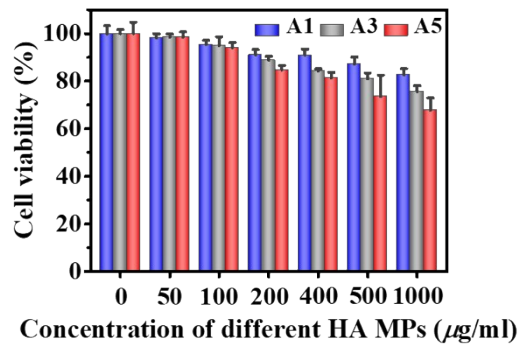

**Fig. S2.** Evaluation of mBMSCs viability after co-culture with different HA MPs, n=6.

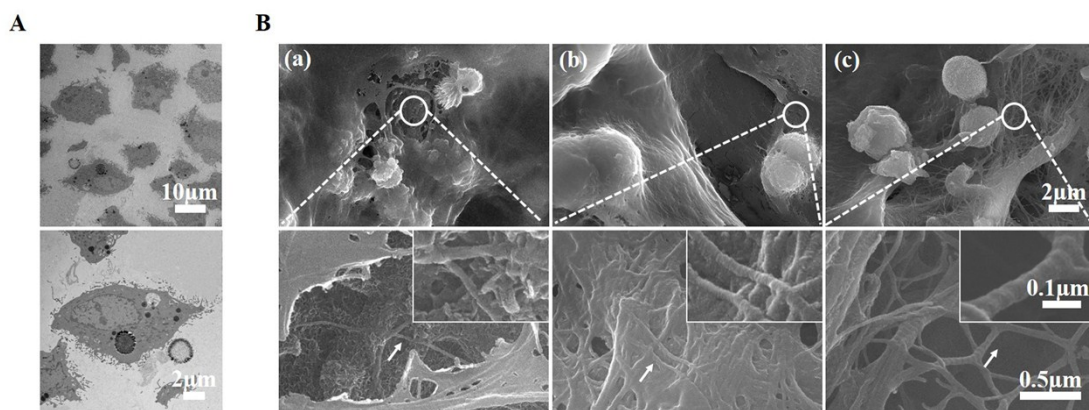

**Fig. S3.** Cells interaction with diverse microspheres after 21days of co-culture. (A) TEM images show that only a few A5 HA MPs residues were observed. (B) The SEM images taken at different magnifications. (a) A1 HA MPs. (b) A3 HA MPs. (c) A5 HA MPs.

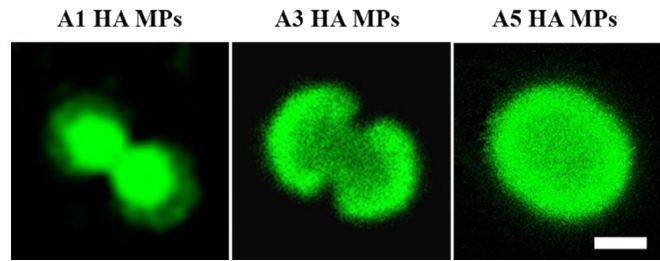

**Fig. S4. Fluorescence images of three microspheres with different morphology labeled by FITC molecule, bar = 1 $\mu$ m.**

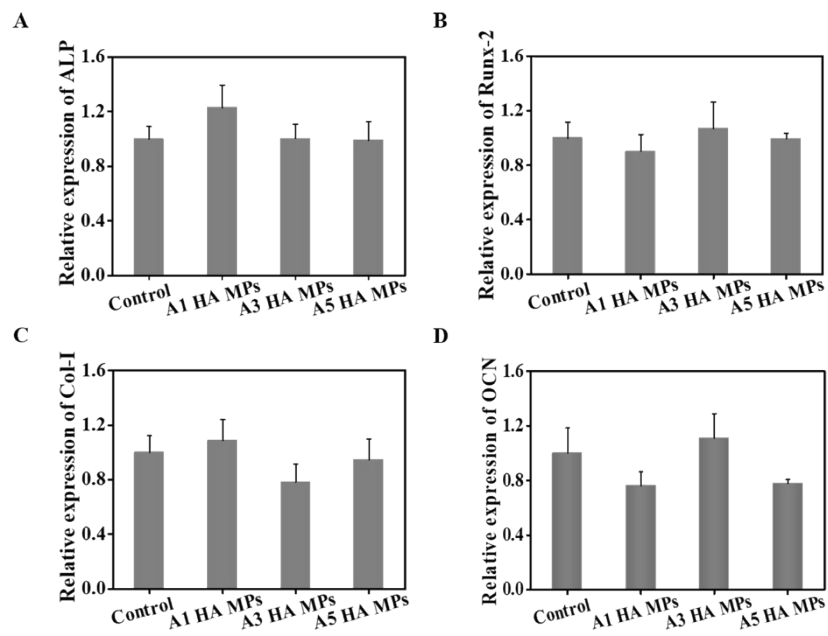

**Fig. S5. Effect of leaching liquor from different HA MPs on the expression of osteogenic genes in mBMSCs of 7 days culture. (A) ALP, (B) Runx-2, (C) Col-I, (D) OCN.**

**Table S1.** Primer sequences of genes related to osteogenic differentiation, including ALP, Runx-2, Col-I, OCN, and GAPDH, were used for the qRT-PCR.

| Primer     | Forward                       | Reverse                         |
|------------|-------------------------------|---------------------------------|
| ALP        | F:5'-TGCCTACTTGTGTGGCGTGAA-3' | R:5'-TCACCCGAGTGGTAGTCACAATG-3' |
| Runx2      | F:5'-CACTGGCGGTGCAACAAGA-3'   | R:5'-TTTCATAACAGCGGAGGCATTTC-3' |
| Collagen-I | F:5'-ATGCCGCGACCTCAAGATG-3'   | R:5'-TGAGGCACAGACGGCTGAGTA-3'   |
| OCN        | F:5'-AGCAGCTTGCCCCAGACCTA-3'  | R:5'-TAGCGCCGGAGTCTGTTCACTAC-3' |
| GAPDH      | F:5'-GATTTGGTCGTATTGGGCG-3'   | R:5'-CTGGAAGATGGTGATGG-3'       |

**Table S2.** Summary of the properties of HA MPs. The stoichiometric ratio of Ca/P, crystallinity, specific surface area and average pore size.

|    | Ca/P ratio | Crystallinity (%) | specific surface area | average pore size |
|----|------------|-------------------|-----------------------|-------------------|
|    |            |                   | m <sup>2</sup> /g     | nm                |
| A1 | 1.24±0.08  | 65                | 48.581                | 21.50             |
| A2 | 1.24±0.03  | 57                | 64.838                | 16.68             |
| A3 | 1.21±0.08  | 38                | 74.832                | 8.77              |
| A4 | 1.21±0.03  | 16                | 85.826                | 7.75              |
| A5 | 1.23±0.05  | 11                | 106.697               | 7.32              |
| A6 | 1.20±0.03  | 9                 | 120.195               | 7.74              |

**Table S3.** Relative expression of mBMSCs markers associated with osteogenic differentiation induced by A1 A3 and A5 HA MPs.

| gene_name | A1 HA MPs vs A3 HA MPs |          | A1 HA MPs vs A5 HA MPs |          | A3 HA MPs vs A5 HA MPs |          |
|-----------|------------------------|----------|------------------------|----------|------------------------|----------|
|           | logFC                  | FDR      | logFC                  | FDR      | logFC                  | FDR      |
| Alpl      | 1.01E-01               | 7.54E-01 | 7.98E-01               | 4.77E-05 | 7.09E-01               | 3.47E-04 |
| Runx-2    | 1.93E-01               | 4.97E-01 | 3.50E-01               | 1.36E-01 | 1.67E-01               | 7.02E-01 |
| Col1a1    | 3.60E-02               | 9.20E-01 | 1.24E+00               | 1.96E-11 | 1.22E+00               | 4.38E-11 |
| Bglap     | 4.19E-01               | 8.71E-02 | 2.59E+00               | 1.15E-07 | 2.18E+00               | 7.58E-06 |
| Bmp2      | 7.98E-01               | 1.39E-03 | 1.22E+00               | 1.67E-06 | 4.30E-01               | 2.09E-01 |
| Camkmt    | 3.93E-01               | 6.28E-01 | 1.06E+00               | 2.23E-02 | 6.78E-01               | 3.50E-01 |
| Ackr4     | 4.75E-01               | 5.47E-01 | 3.08E+00               | 3.70E-18 | 2.62E+00               | 5.08E-14 |
| Sacs      | 3.91E-01               | 2.19E-01 | 1.03E+00               | 4.18E-02 | 6.48E-01               | 3.66E-01 |
| Scamp5    | 8.29E-01               | 1.35E-01 | 8.94E-01               | 5.10E-02 | 7.68E-02               | 9.62E-01 |
| Rapgef4   | 5.00E-01               | 3.47E-01 | 1.47E+00               | 2.82E-05 | 9.80E-01               | 2.26E-02 |
| Rap1gap   | 6.82E-01               | 4.60E-02 | 8.02E-01               | 1.28E-02 | 1.31E-01               | 8.79E-01 |
| Rapgef1   | 3.35E-01               | 1.97E-01 | 6.85E-01               | 3.34E-02 | 3.60E-01               | 4.43E-01 |
| Rassf2    | 4.14E-02               | 9.46E-01 | 8.25E-01               | 4.79E-03 | 7.94E-01               | 1.41E-02 |
| Raf1      | -1.09E-01              | 8.11E-01 | 3.03E-01               | 3.03E-01 | 4.21E-01               | 3.11E-01 |
| Smek2     | -1.96E-01              | 4.89E-01 | 4.57E-03               | 9.98E-01 | 2.12E-01               | 5.98E-01 |
| Cerk      | 1.38E-01               | 7.79E-01 | 7.88E-01               | 6.12E-03 | 6.61E-01               | 4.23E-02 |
